# Supplementary material for: Global, regional, and national epidemiology of migraine and tension-type headache in youths and young adults aged 15–39 years from 1990 to 2019: findings from the global burden of disease study 2019
Source: PubMed Central journal article supplement (PMC10506184; doi:10.1186/s10194-023-01659-1), 2023-09-18

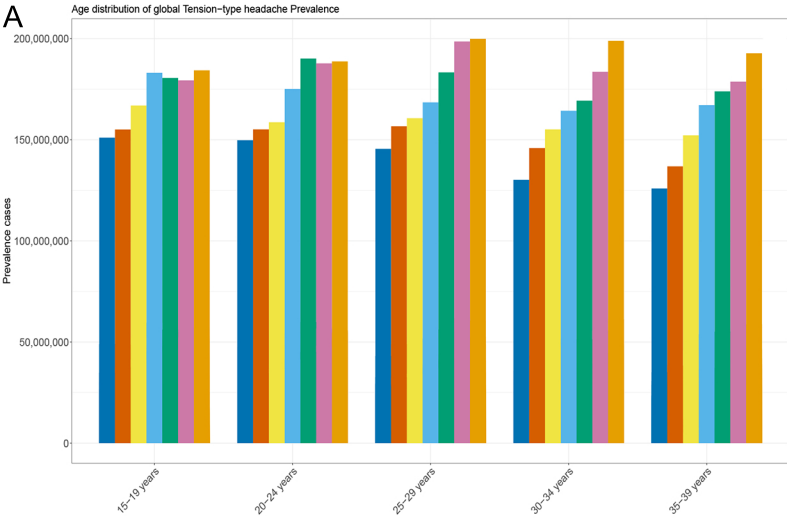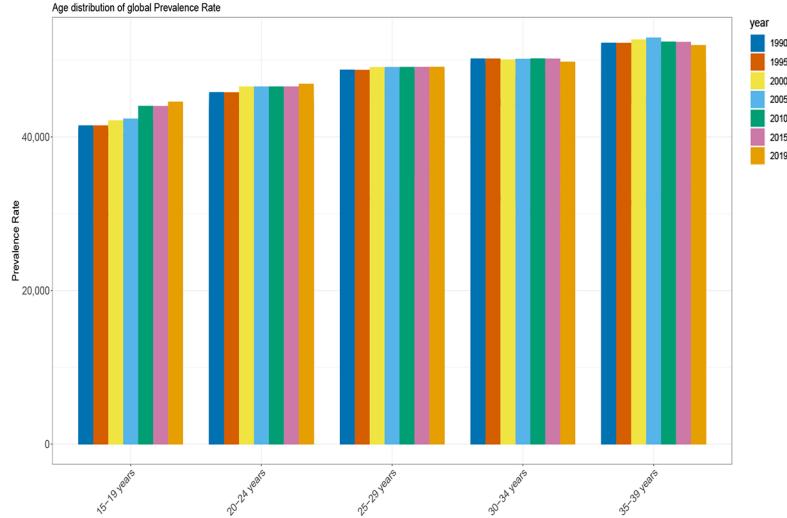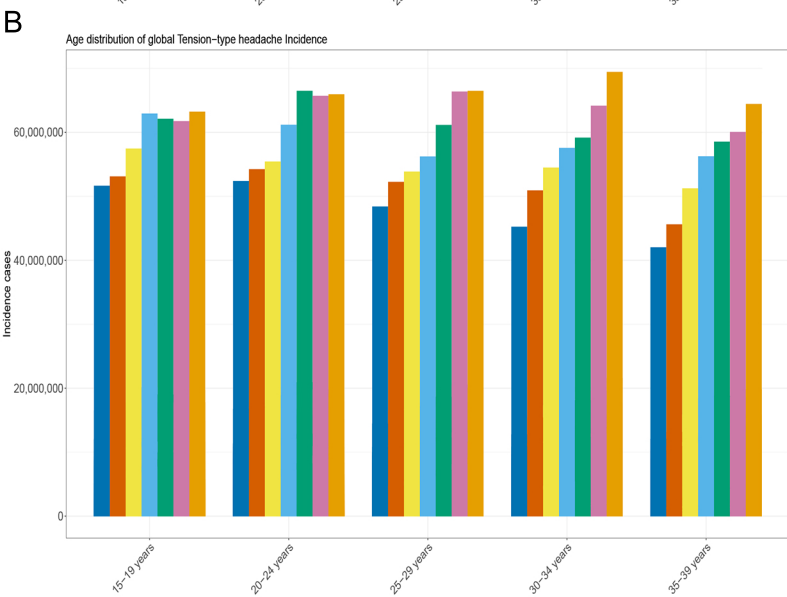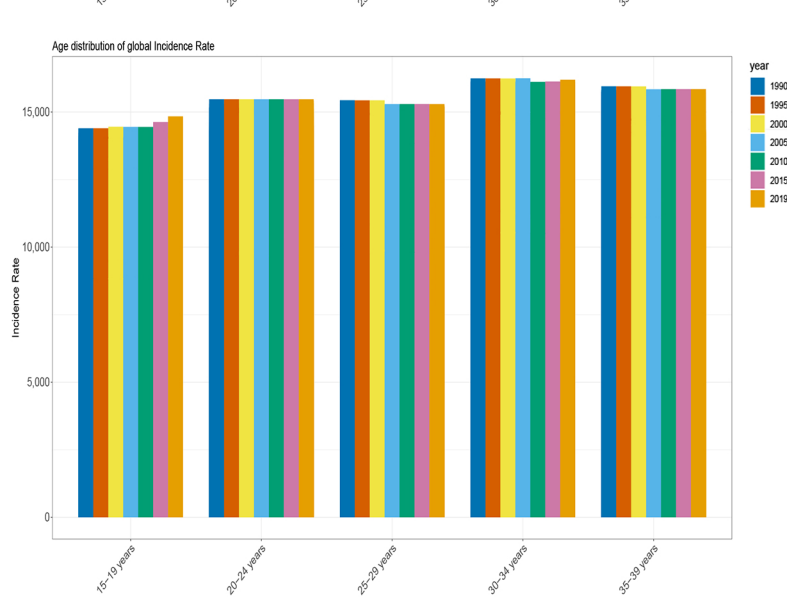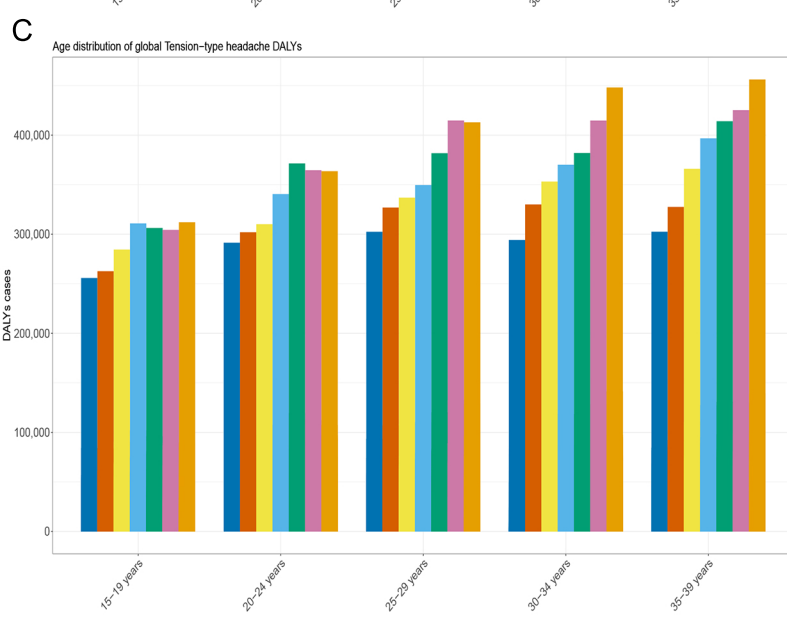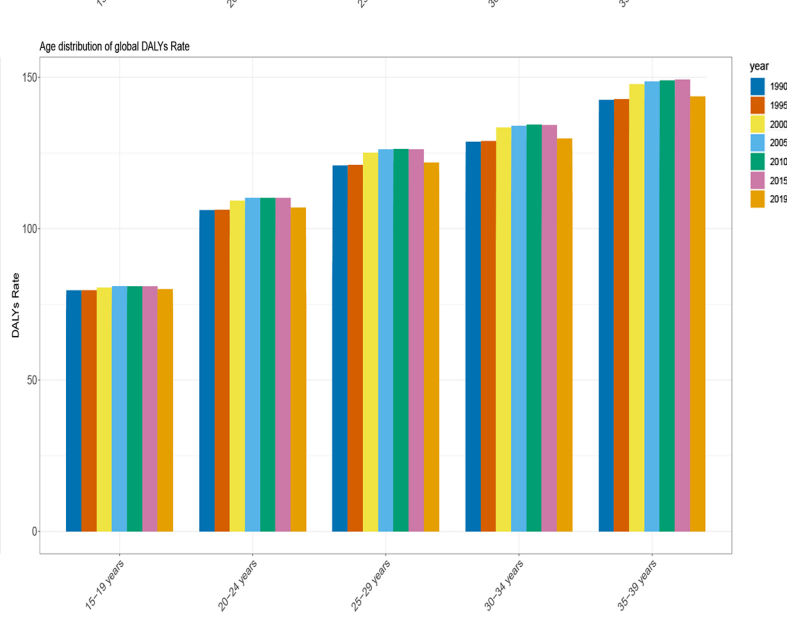

Supplement: 10194_2023_1659_MOESM3_ESM.pdf [file 10194_2023_1659_MOESM3_ESM.pdf]
